# Supplementary material for: Facile synthesis of a cationic-doped [Ca24Al28O64]4+(4e−) compositeviaa rapid citrate sol–gel method
Source: Royal Society of Chemistry journal article supplement (doi:10.1039/c7dt04543c), 2018-01-01
Supplement: c7dt04543c1.pdf [file c7dt04543c1.pdf]

## Supporting data

# Facile synthesis of cationic doped $[\text{Ca}_{24}\text{Al}_{28}\text{O}_{64}]^{4+} \cdot (4\text{e}^-)$ composite via rapid citrate sol-gel method

Karim Khan<sup>a\*</sup>, Ayesha Khan Tareen<sup>b</sup>, Sayed Elshahat<sup>a</sup>, Ashish Yadav<sup>a</sup>, Usman Khan<sup>c</sup>, Minghui Yang<sup>b</sup>,

Luigi Bibbò<sup>a</sup>, Zhengbiao Ouyang<sup>a\*</sup>

<sup>a</sup> College of Electronic Science and Technology of Shenzhen University, THz Technical Research Center of Shenzhen University, Key Laboratory of Optoelectronics Devices and Systems of Ministry of Education and Guangdong Province Shenzhen University, Shenzhen 518060.

<sup>b</sup> Ningbo Institute of Material Technology and Engineering, Chinese Academy of Sciences, Ningbo, 315201, P. R. China,

<sup>c</sup> Low dimensional materials and devices laboratory, Tsinghua-Berkeley Shenzhen institute, Tsinghua University Shenzhen, 518055, PR China.

\*Corresponding author: [zbouyang@szu.edu.cn](mailto:zbouyang@szu.edu.cn) (Zhengbiao Ouyang), [karim\\_khan\\_niazi@yahoo.com](mailto:karim_khan_niazi@yahoo.com) (Karim Khan)

## 1. XRD data

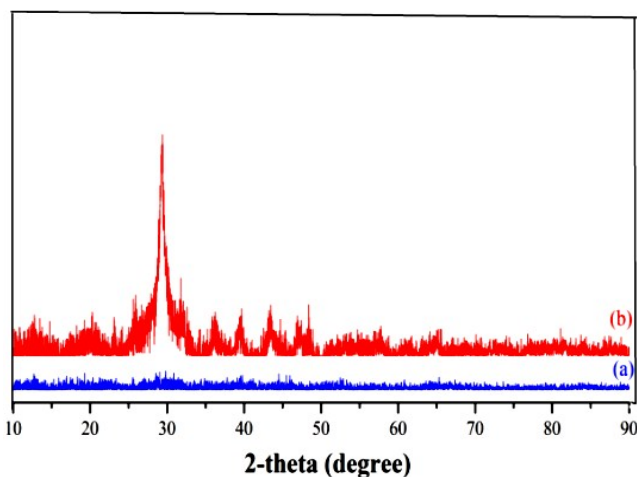

Fig. S1: XRD graph of sample heat treated at 700 °C in (a) N<sub>2</sub>- (b) air-atmosphere.

## 2. Thermogravimetric and differential temperature analysis (TG/DTA) Analysis:

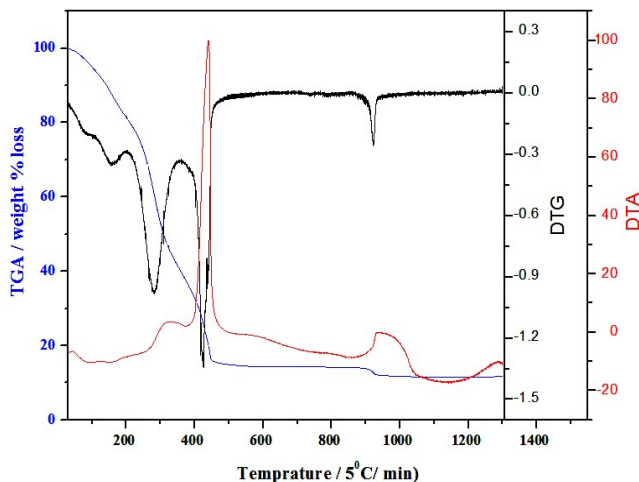

**Fig. S2.** TG/DTA graph of gel formed by mixed-milled nitrates heat treated at about 100 °C.
